# Supplementary material for: Fluorinated graphene: facile solution preparation and tailorable properties by fluorine-content tuning
Source: Royal Society of Chemistry journal article supplement (doi:10.1039/c4ta00847b), 2014-01-01
Supplement: c4ta00847b1.pdf [file c4ta00847b1.pdf]

## Electronic Supplementary Information

# Fluorinated Graphene: Facile Solution Preparation and Tailorable Properties by Fluorine-content Tuning

Fu-Gang Zhao,<sup>a, ‡</sup> Gang Zhao,<sup>b, ‡</sup> Xin-Hua Liu,<sup>c</sup> Cong-Wu Ge,<sup>a</sup> Jin-Tu Wang,<sup>a</sup> Bai-Li Li,<sup>a</sup> Qi-Gang Wang,<sup>\*c</sup> Wei-Shi Li,<sup>\*a</sup> and Qing-Yun Chen<sup>\*b</sup>

<sup>a</sup> *Laboratory of Synthetic and Self-Assembly Chemistry for Organic Functional Molecules, Shanghai Institute of Organic Chemistry, Chinese Academy of Sciences, 345 Lingling Road, Shanghai 200032, China. E-mail: liws@mail.sioc.ac.cn.*

<sup>b</sup> *Key Laboratory of Organofluorine Chemistry, Shanghai Institute of Organic Chemistry, Chinese Academy of Sciences, 345 Lingling Road, Shanghai 200032, China. E-mail: chenqy@mail.sioc.ac.cn.*

<sup>c</sup> *Department of Chemistry, Tongji University, 1239 Siping Road, Shanghai 200092, China. E-mail: wangqg66@tongji.edu.cn.*

<sup>‡</sup> These authors contributed equally to this work.

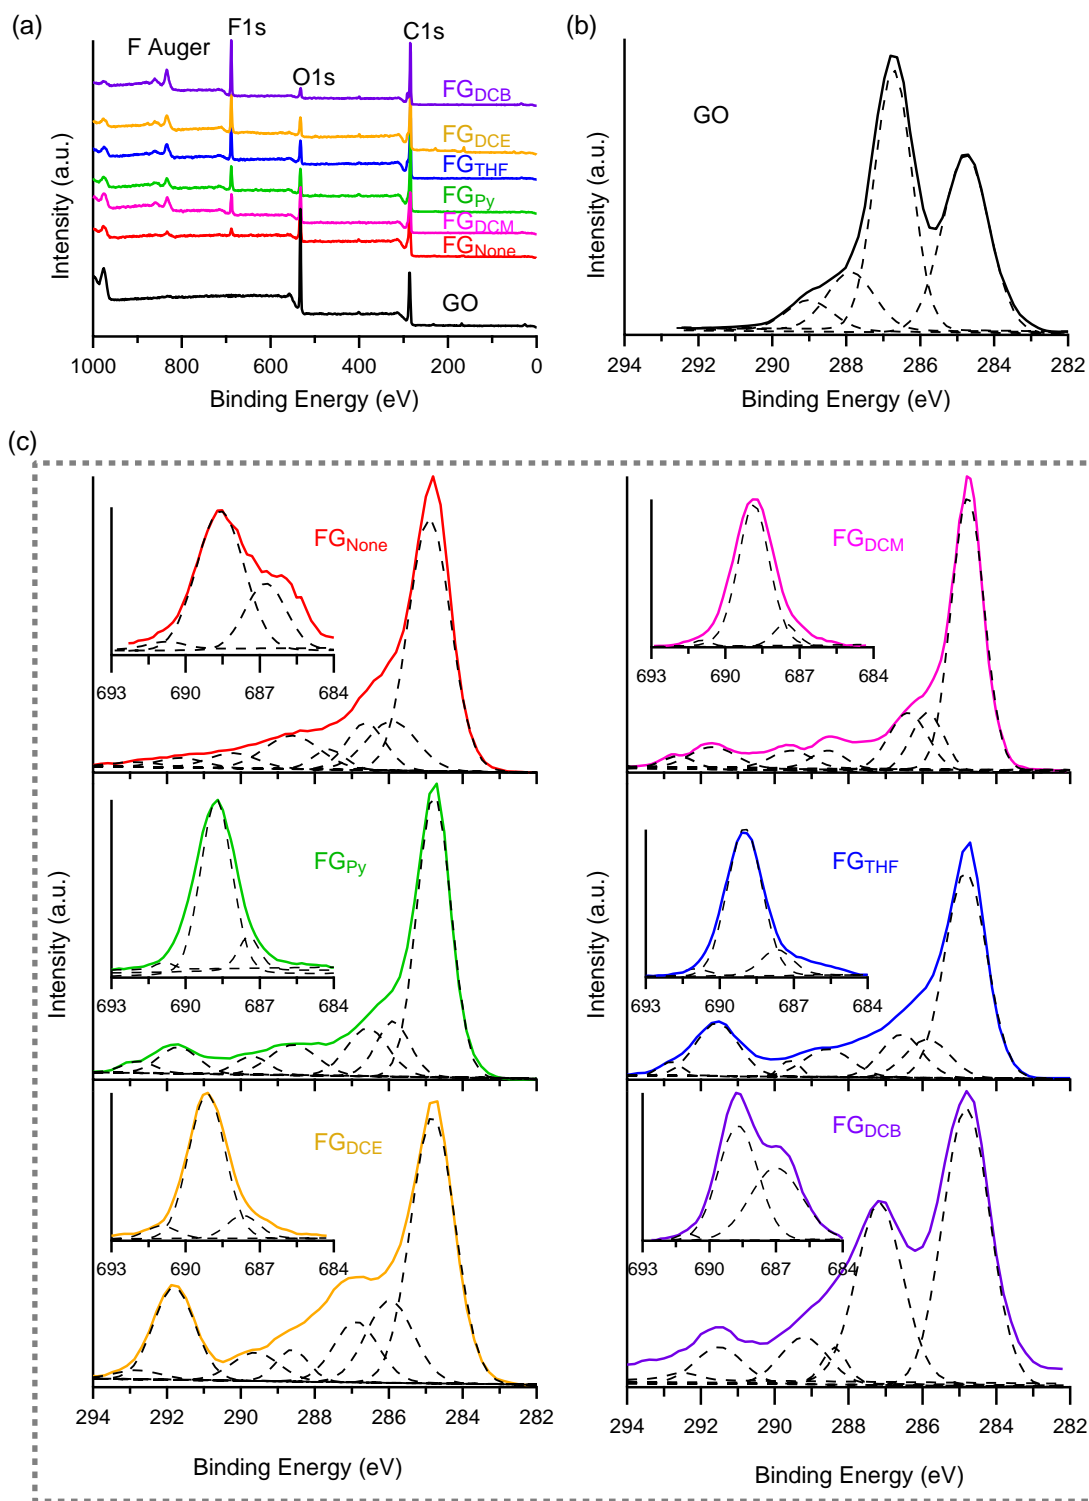

**Fig. S1** (a) Survey XPS spectra of as-prepared GO and fluorinated graphene products. C1s XPS spectra of (b) GO and (c) fluorinated graphene products. Insets: F1s XPS spectra of fluorinated graphene products.

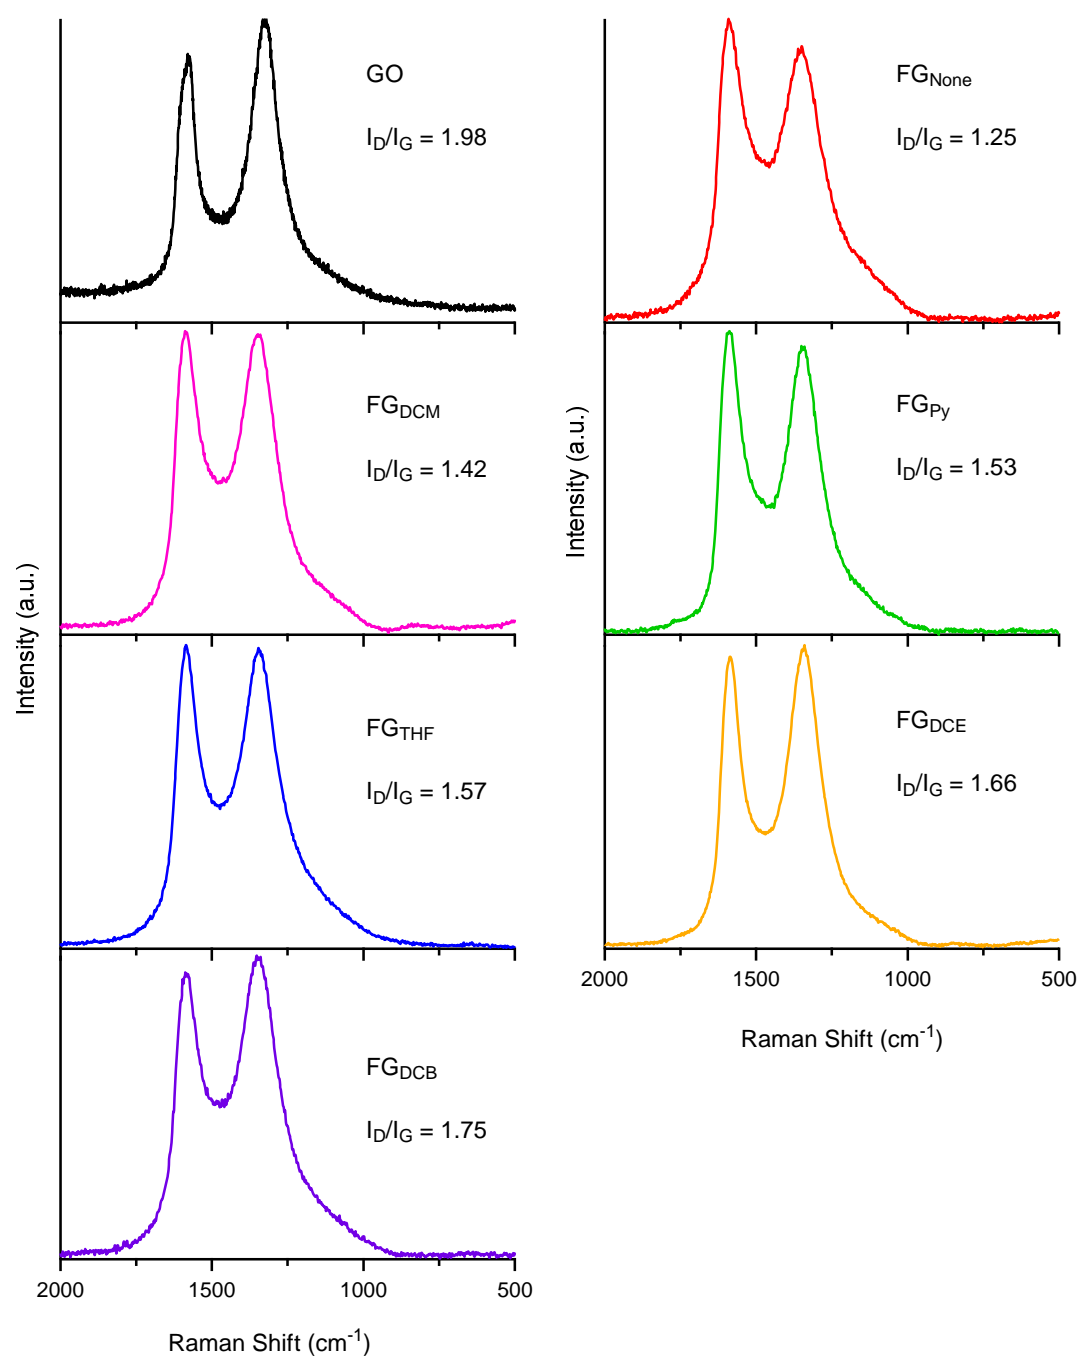

**Fig. S2** Raman spectra and corresponding  $I_D/I_G$  ratio of GO and fluorinated graphene products.

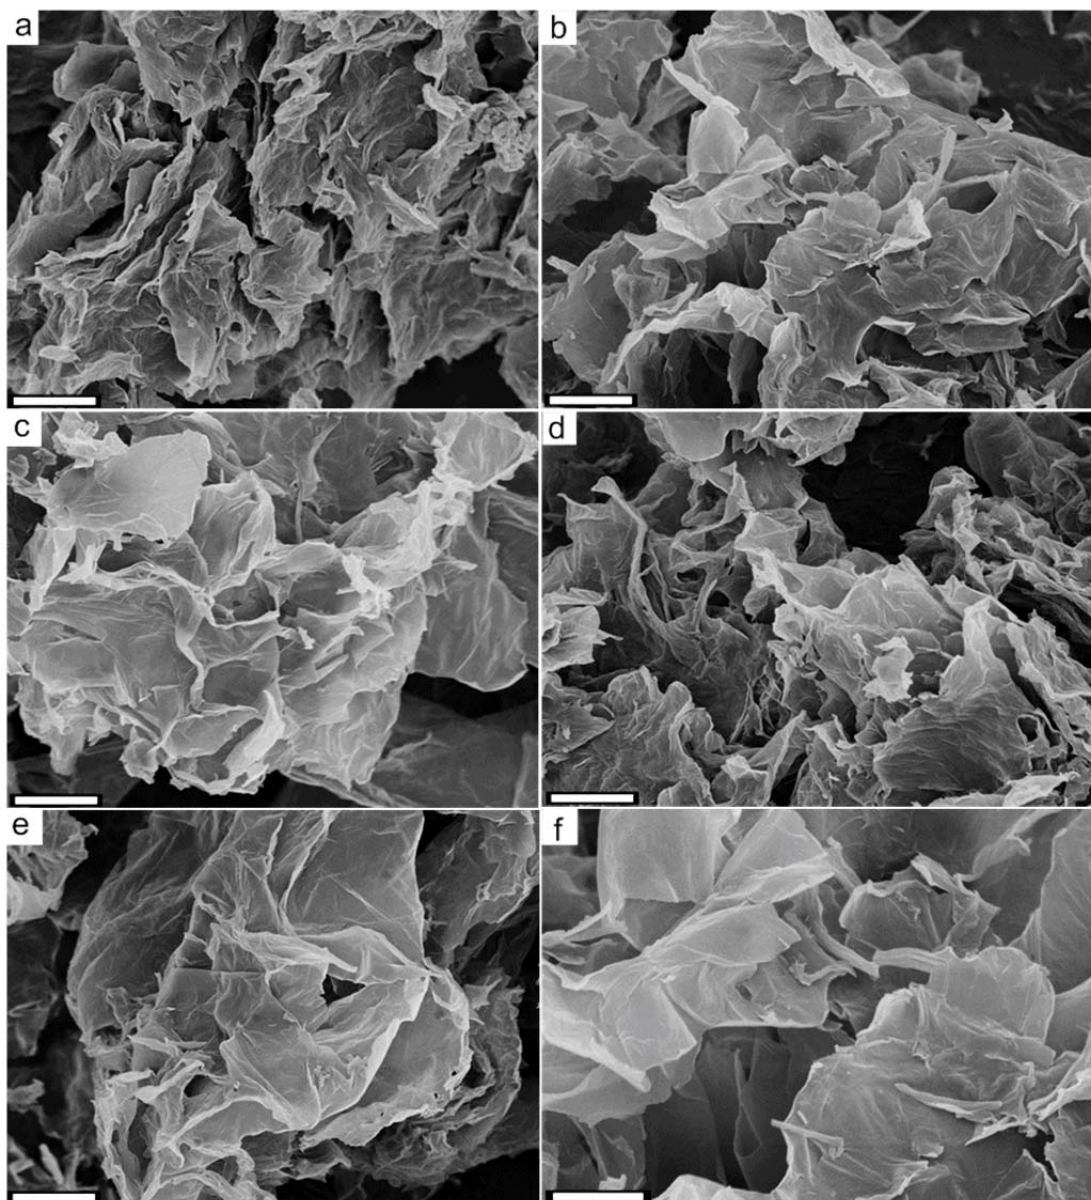

**Fig. S3** FE-SEM images of freeze-dried (a)  $FG_{None}$ , (b)  $FG_{DCM}$ , (c)  $FG_{Py}$ , (d)  $FG_{THF}$ , (e)  $FG_{DCE}$ , and (f)  $FG_{DCB}$  powders. Scale bar:  $2 \mu m$ .

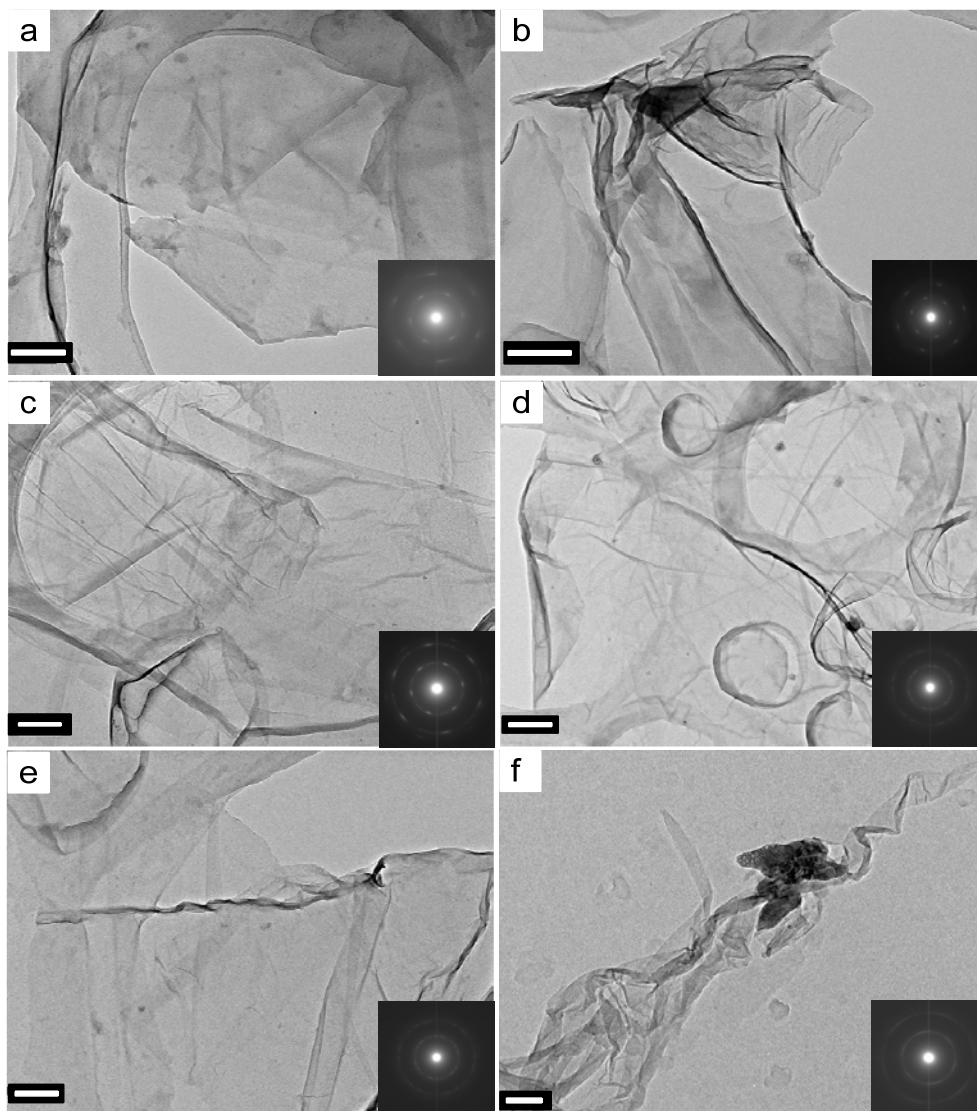

**Fig. S4** TEM images and SAED patterns of (a)  $FG_{None}$ , (b)  $FG_{DCM}$ , (c)  $FG_{Py}$ , (d)  $FG_{THF}$ , (e)  $FG_{DCE}$ , and (f)  $FG_{DCB}$ . Scale bar: 200 nm

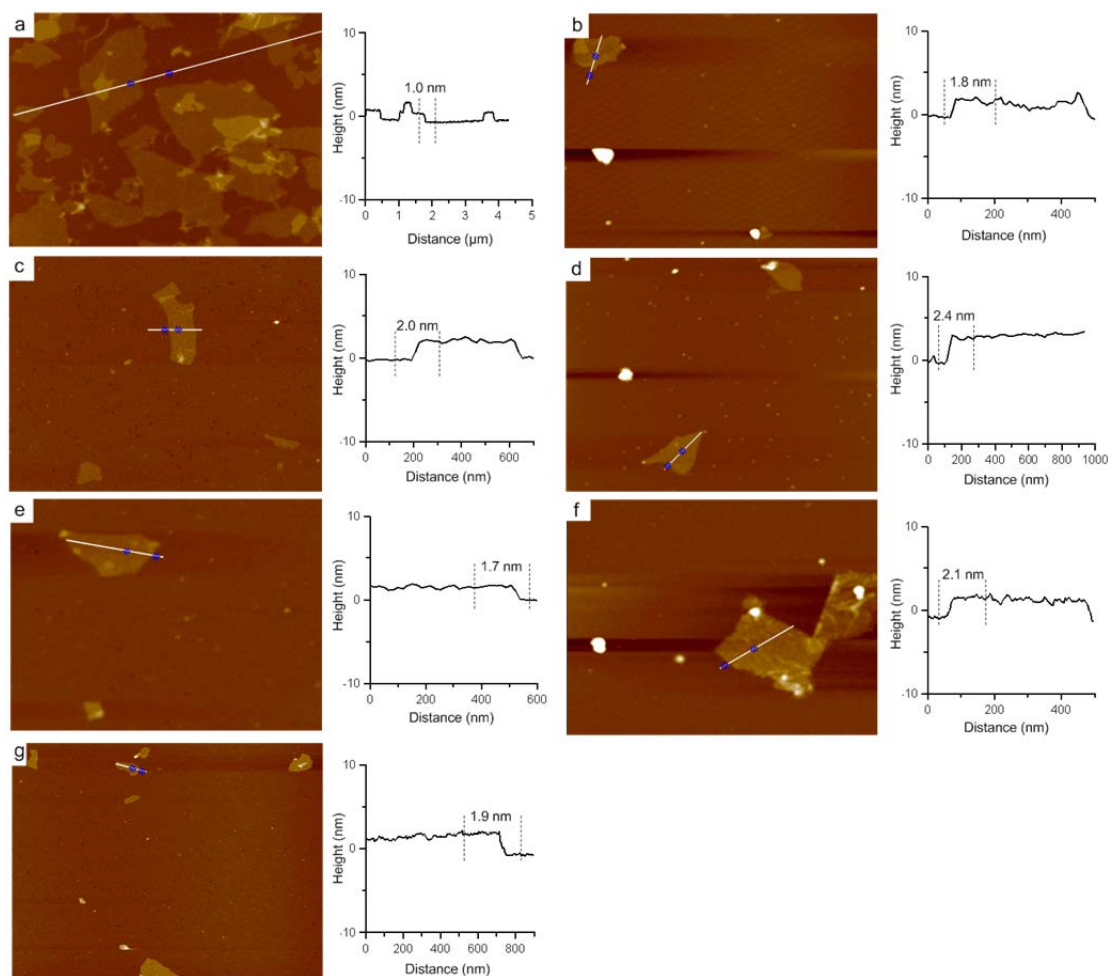

**Fig. S5** AFM images and corresponding height profiles of (a) GO, (b)  $FG_{None}$ , (c)  $FG_{DCM}$ , (d)  $FG_{Py}$ , (e)  $FG_{THF}$ , (f)  $FG_{DCE}$ , and (g)  $FG_{DCB}$ .

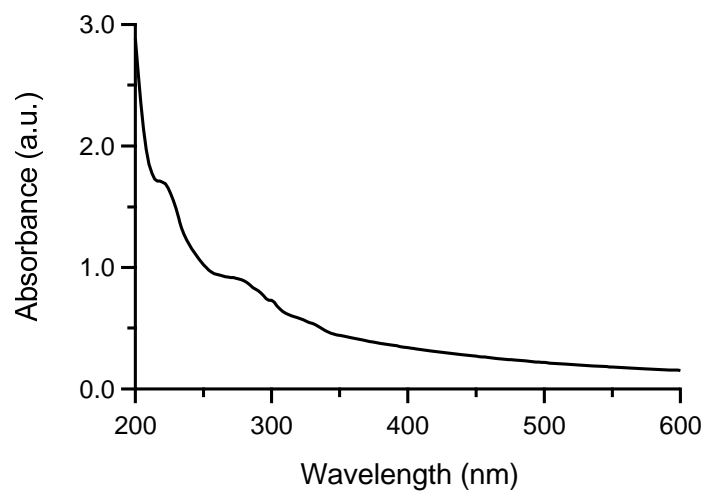

**Fig. S6** UV-vis absorption spectra of GO in  $\text{CH}_3\text{CN}$  solution with a concentration of  $2.5 \times 10^{-3} \text{ mg mL}^{-1}$ . The calculated bandgap of GO is about 3.46 eV, according to empirical formula of  $1240/\lambda_{\text{Abs, onset}}$ .

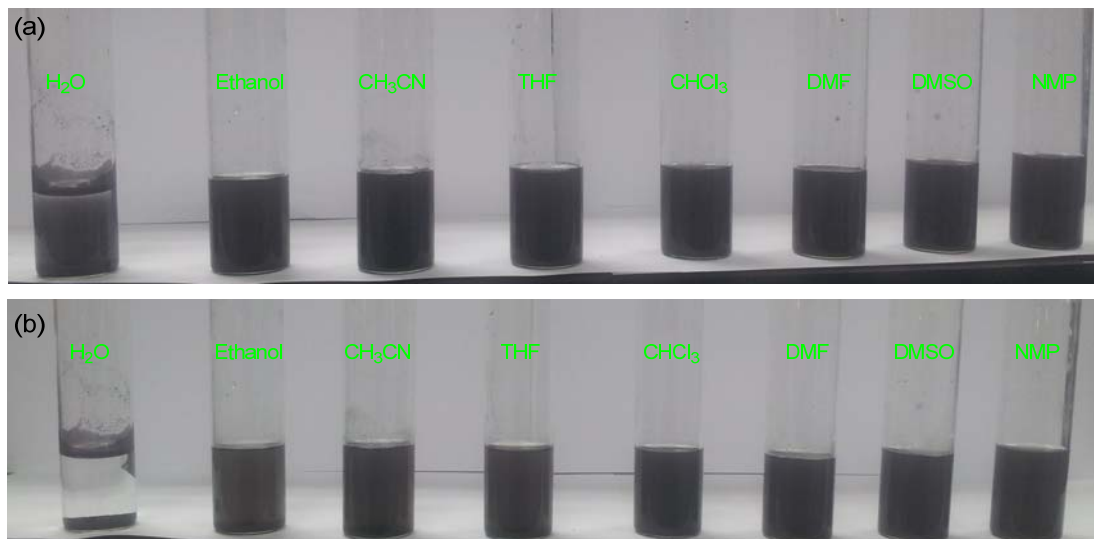

**Fig. S7** Dispersibility of  $\text{FG}_{\text{DCB}}$  in a variety of solvents with a concentration of  $1 \text{ mg mL}^{-1}$  at room temperature. (a) as-ultrasonicated; (b) left undisturbed for 3 days.

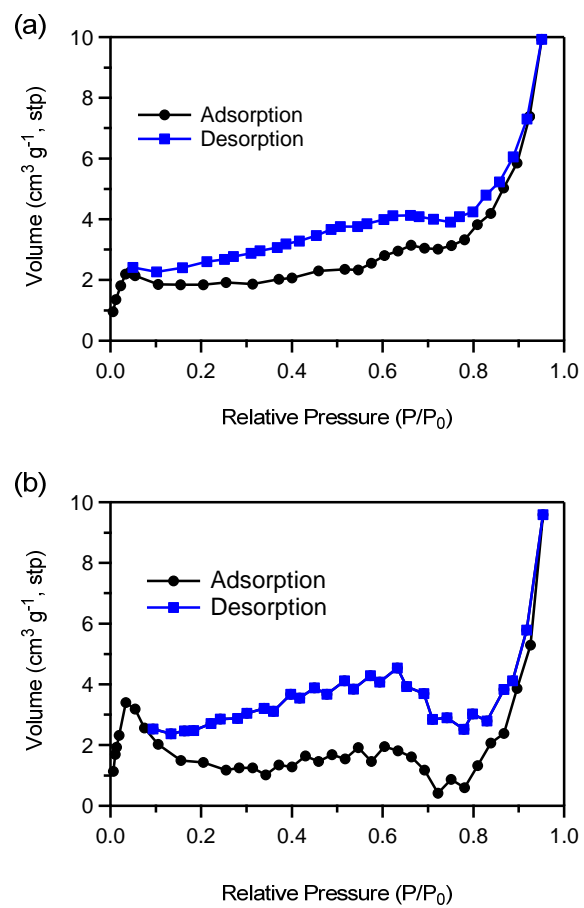

**Fig. S8** Nitrogen adsorption and desorption isotherms of (a)  $\text{FG}_{\text{DCM}}$  and (b)  $\text{FG}_{\text{THF}}$
